# Supplementary material for: Halloysite Nanotube-Reinforced Ion-Incorporated Hydroxyapatite-Chitosan Composite Coating on Ti-6Al-4 V Alloy for Implant Application
Source: Hindawi journal article supplement (doi:10.1155/2019/7472058), 2019-03-06

## Graphical abstracts

HNT-CS-MHA composite was deposited on ti alloy surfaces. The coated implant should be used as biomedical applications.

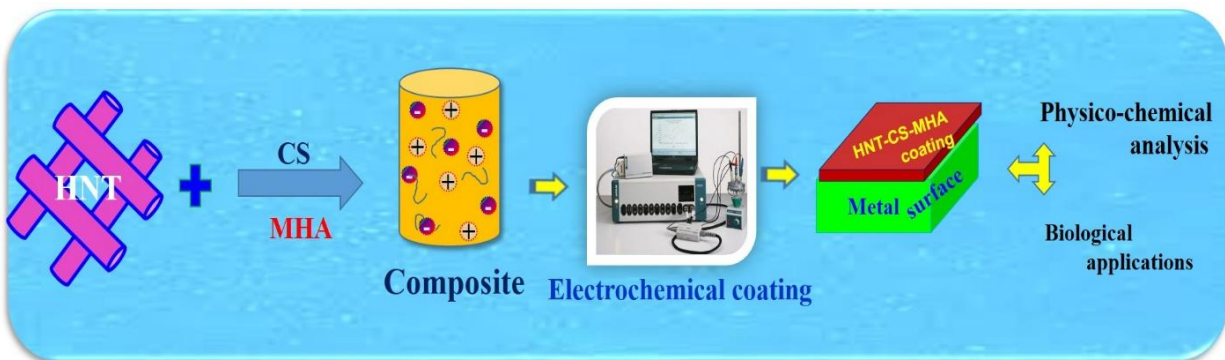

Supplement: f1 [file 7472058.f1.pdf]
